# Supplementary material for: Robustness from flexibility in the fungal circadian clock
Source: Springer Nature journal article supplement (doi:10.1186/1752-0509-4-88), 2010-06-24
Supplement: 12918_2009_477_MOESM2_ESM.pdf [file 12918_2009_477_MOESM2_ESM.pdf]

WC1 loop

WC1  $\longrightarrow$  WC1

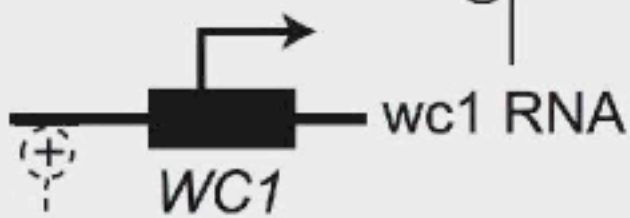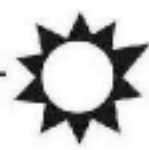

WC1\*

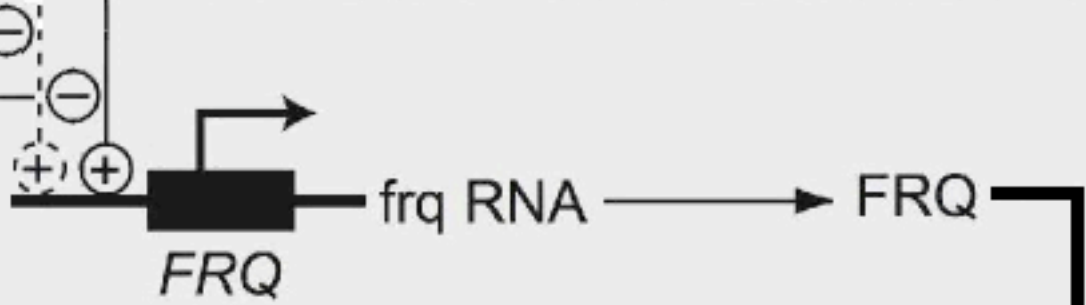

FRQ

FRQ loop
