# Supplementary material for: Robustness from flexibility in the fungal circadian clock
Source: Springer Nature journal article supplement (doi:10.1186/1752-0509-4-88), 2010-06-24

**A**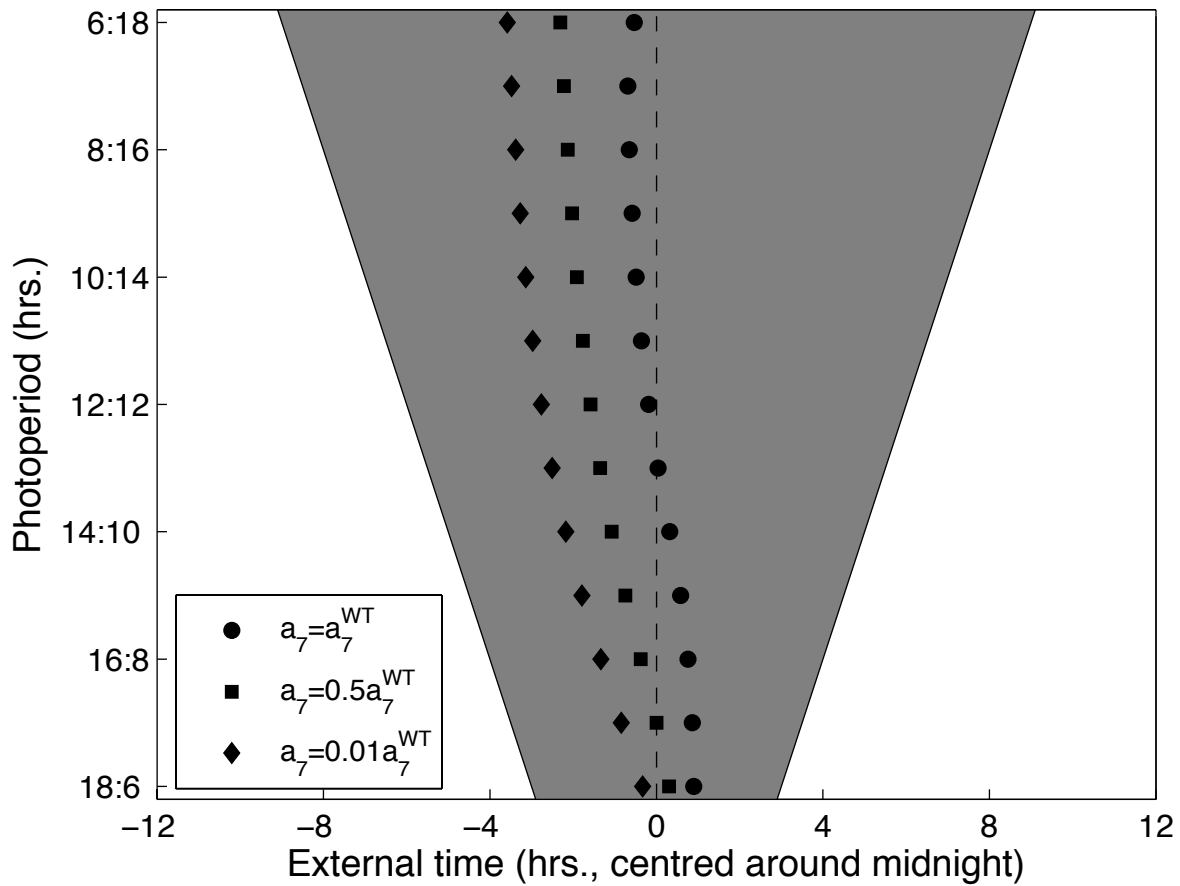**B**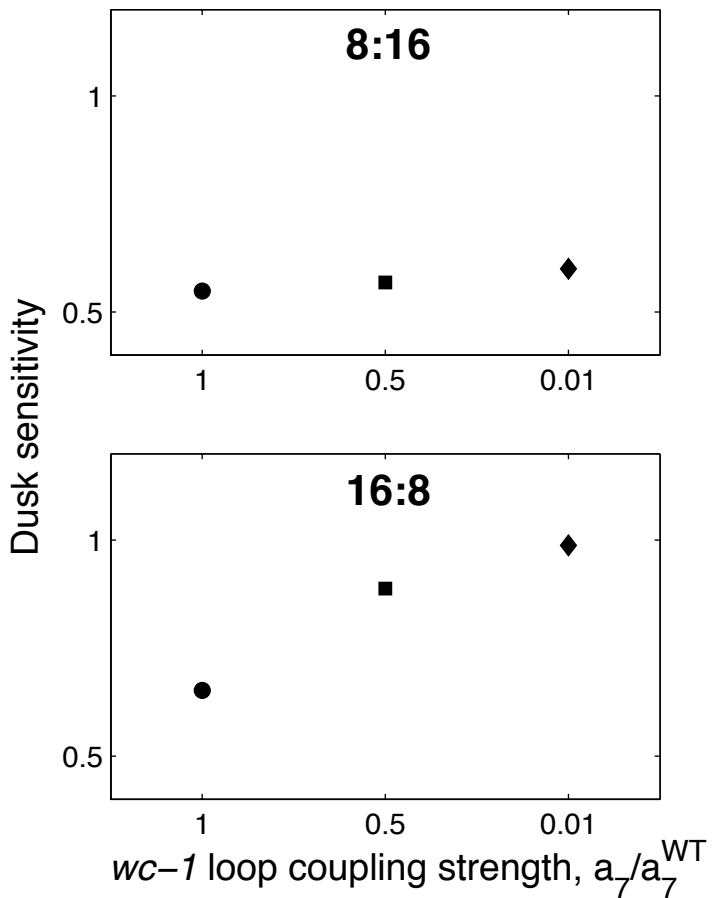

Supplement: 12918_2009_477_MOESM7_ESM.pdf [file 12918_2009_477_MOESM7_ESM.pdf]
