# Supplementary material for: Robustness from flexibility in the fungal circadian clock
Source: Springer Nature journal article supplement (doi:10.1186/1752-0509-4-88), 2010-06-24

Phase change,  $s_i$  (hrs.)

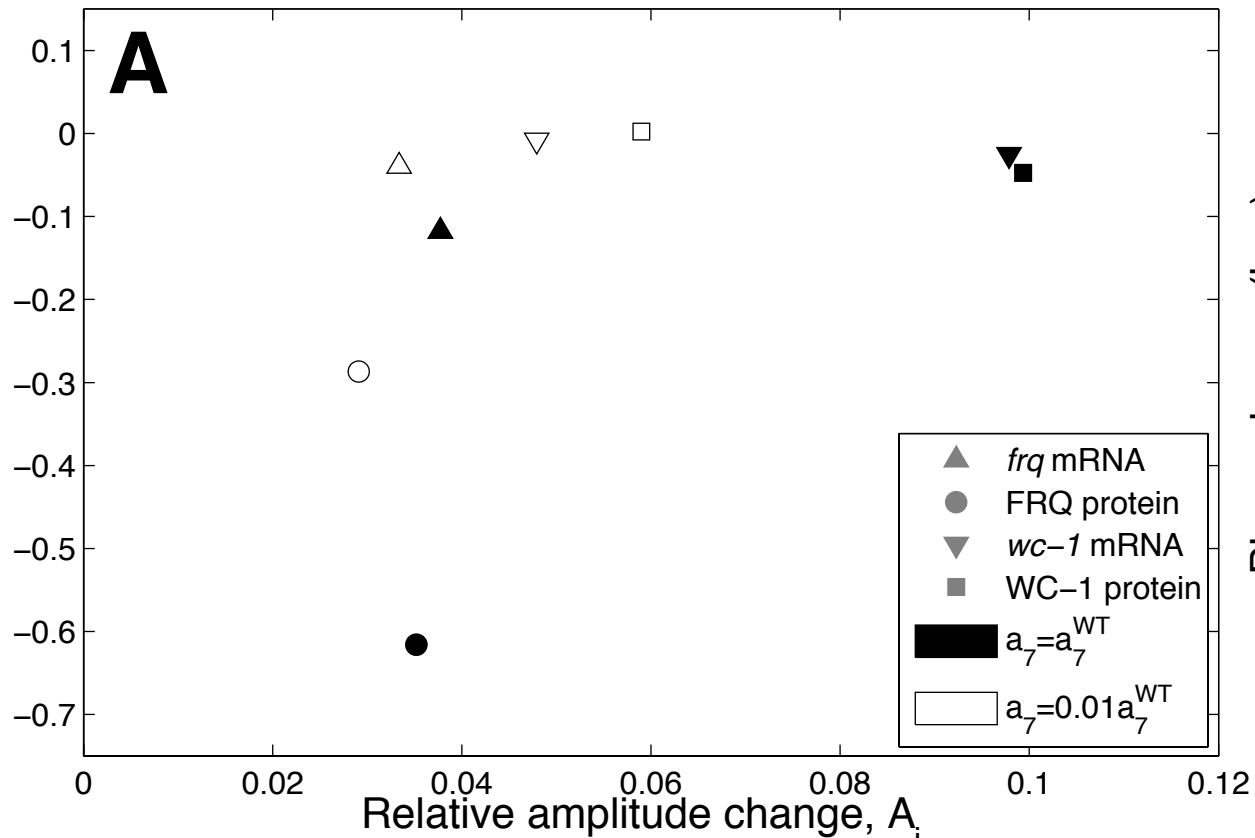

Phase change (hrs.)

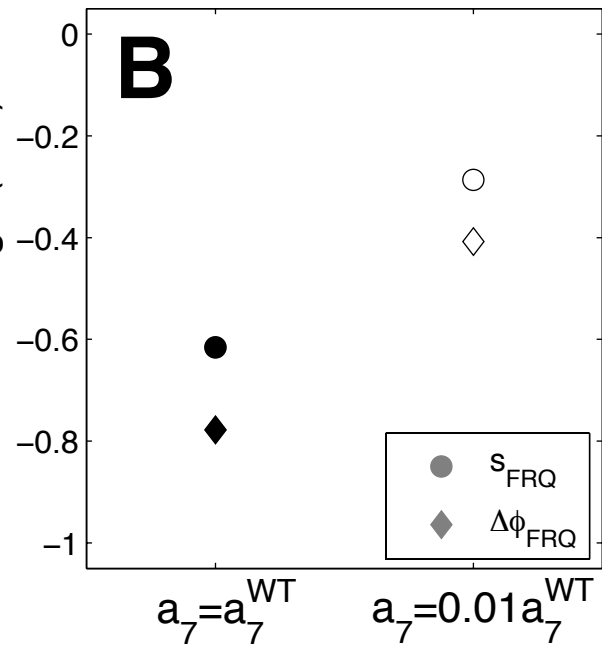

Supplement: 12918_2009_477_MOESM9_ESM.pdf [file 12918_2009_477_MOESM9_ESM.pdf]
